# Supplementary material for: Identifying distinct classes of bladder carcinoma using microarrays
Source: Springer Nature journal article supplement (doi:10.1038/ng1061), 2002-12-09
Supplement: ng1061-S13.pdf [file ng1061-S13.pdf]

**Web Table F:** Recurrence prediction results of 39 gene cross-validation loops.

| Group | Patient | Tumour (date)   | Prediction | Error | Prediction strength |
|-------|---------|-----------------|------------|-------|---------------------|
| A     | 968-1   | Ta gr2          | 0          |       | 0.19                |
| A     | 928-1   | Ta gr2          | 0          |       | 0.49                |
| A     | 934-1   | Ta gr2 (220798) | 0          |       | 1.73                |
| A     | 709-1   | Ta gr2 (210798) | 0          |       | 0.45                |
| A     | 930-1   | Ta gr2 (300698) | 0          |       | 0.82                |
| A     | 524-1   | Ta gr2 (201095) | 0          |       | 0.14                |
| A     | 455-1   | Ta gr2 (060695) | 1          | *     | 0.68                |
| A     | 370-1   | Ta gr2 (100195) | 0          |       | 0.32                |
| A     | 810-1   | Ta gr2 (031097) | 0          |       | 0.45                |
| A     | 1146-1  | Ta gr2 (231199) | 0          |       | 0.98                |
| A     | 1161-1  | Ta gr2 (101299) | 0          |       | 0.03                |
| A     | 1006-1  | Ta gr2 (231198) | 1          | *     | 1.57                |
| A     | 942-1   | Ta gr2          | 0          |       | 0.31                |
| A     | 1060-1  | Ta gr2          | 1          | *     | 0.81                |
| A     | 1255-1  | Ta gr2          | 1          | *     | 0.71                |
| B     | 441-1   | Ta gr2          | 1          |       | 1.03                |
| B     | 780-1   | Ta gr2          | 1          |       | 0.37                |
| B     | 815-2   | Ta gr2          | 1          |       | 0.35                |
| B     | 829-1   | Ta gr2          | 1          |       | 0.75                |
| B     | 861-1   | Ta gr2          | 0          | *     | 2.55                |
| B     | 925-1   | Ta gr2          | 1          |       | 0.78                |
| B     | 1008-1  | Ta gr2          | 0          | *     | 0.12                |
| B     | 1086-1  | Ta gr2          | 0          | *     | 0.51                |
| B     | 1105-1  | Ta gr2          | 1          |       | 0.37                |
| B     | 1145-1  | Ta gr2          | 1          |       | 0.44                |
| B     | 1327-1  | Ta gr2          | 1          |       | 1.96                |
| B     | 1352-1  | Ta gr2          | 0          | *     | 0.97                |
| B     | 1379-1  | Ta gr2          | 1          |       | 0.67                |
| B     | 533-1   | Ta gr2          | 1          |       | 0.31                |
| B     | 679-1   | Ta gr2          | 1          |       | 0.82                |
| B     | 692-1   | Ta gr2          | 1          |       | 0.45                |

**Group A:** Primary tumours from patients with no recurrence of the disease for 2 years.

**Group B:** Primary tumours from patients with recurrence of the disease within 8 months.

**Prediction:** 0=no recurrence, 1=recurrence.

**Prediction strength:** The relative difference between the distance to the closest and the second closest group compared to the distance to the closest group.
